# Supplementary material
Source: publisher figshare collection journal article supplement (https://tandf.figshare.com/ndownloader/files/14119955)
Supplement: Supplementary file 1 [file 14119955]

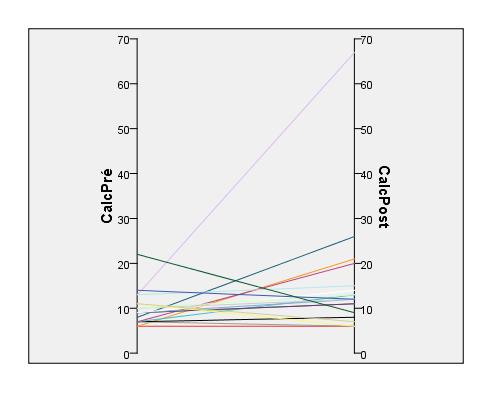


Supplemental Figure S1 - Evolution of calculation speed. (Second) CalcPre/Post : Calculation speed before / after session.
